# Supplementary material for: Enhancing wheat regeneration and genetic transformation through overexpression of TaLAX1
Source: PubMed Central journal article supplement — Plant Commun. 2023 Oct 28;5(5):100738. doi: 10.1016/j.xplc.2023.100738 (PMC11121199; doi:10.1016/j.xplc.2023.100738), 2023-10-28
Supplement: mmc1.pdf [file mmc1.pdf]

**Plant Communications, Volume 5**

**Supplemental information**

**Enhancing wheat regeneration and genetic transformation through overexpression of *TaLAX1***

**Yang Yu, Haixia Yu, Jing Peng, Wang Jinsong Yao, Yi Peng Wang, Feng Li Zhang, Shi Rong Wang, Yajie Zhao, Xiang Yu Zhao, Xian Sheng Zhang, and Ying Hua Su**

1 Supplemental Figures and legends

2 Supplemental Figure 1

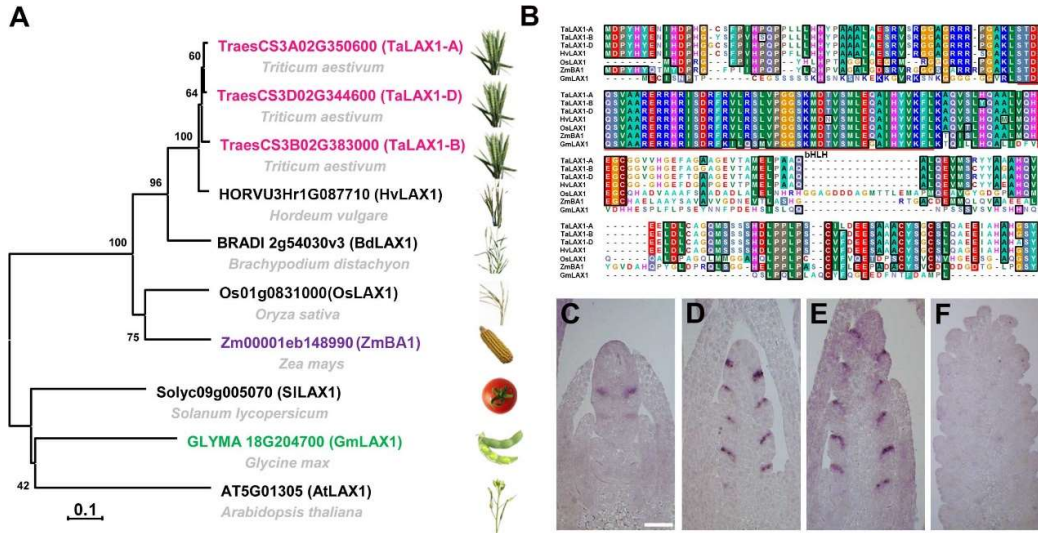

3

4 Supplemental Figure 1. Phylogenetic relationships among LAX1 homologous  
5 proteins and the expression pattern of *TaLAX1* in the development of wheat spikes.  
6 (Supports Figures 1 and 7)

7 (A) Phylogenetic trees of LAX1 homologous proteins for wheat (*Triticum aestivum*),  
8 barley (*Hordeum vulgare*), Brachypodium (*Brachypodium distachyon*), rice (*Oryza*  
9 *sativa*), maize (*Zea mays*), tomato (*Solanum lycopersicum*), soybean (*Glycine max*) and  
10 Arabidopsis (*Arabidopsis thaliana*). The evolutionary analysis was conducted based on  
11 OsLAX1 protein sequences in MEGA 11 using the neighbor-joining method.

12 (B) Comparison of the predicted amino acid sequences of TaLAX1-A/B/D, HvLAX1,  
13 OsLAX1, ZmBA1, and GmLAX1 proteins. The basic helix-loop-helix (bHLH) domain  
14 is indicated by a red horizontal line.

15 (C-F) RNA *in situ* hybridizations analyses indicate the expression pattern of *TaLAX1*  
16 at the single ridge stage (C), double ridge stage (D), glume primordium differentiation  
17 stage (E) and floret differentiation stage (F) of the Chinese Spring wheat spikes. An  
18 antisense probe derived from the whole coding region of *TaLAX1-A* was used. Scale  
19 bar = 200  $\mu$ m.

20

21 **Supplemental Figure 2**

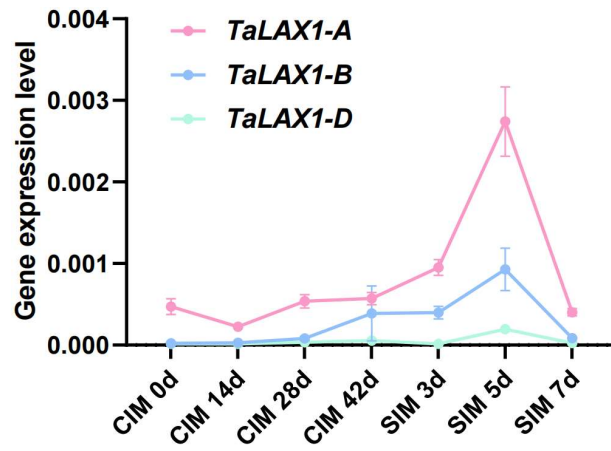

22

23 **Supplemental Figure 2. Expression level of *TaLAX1-A/B/D* in the regeneration**  
24 **process of Chinese Spring. (Supports Figure 1)**

25 Values are means  $\pm$  SD, calculated from three individual experiments.

26

27 **Supplemental Figure 3**

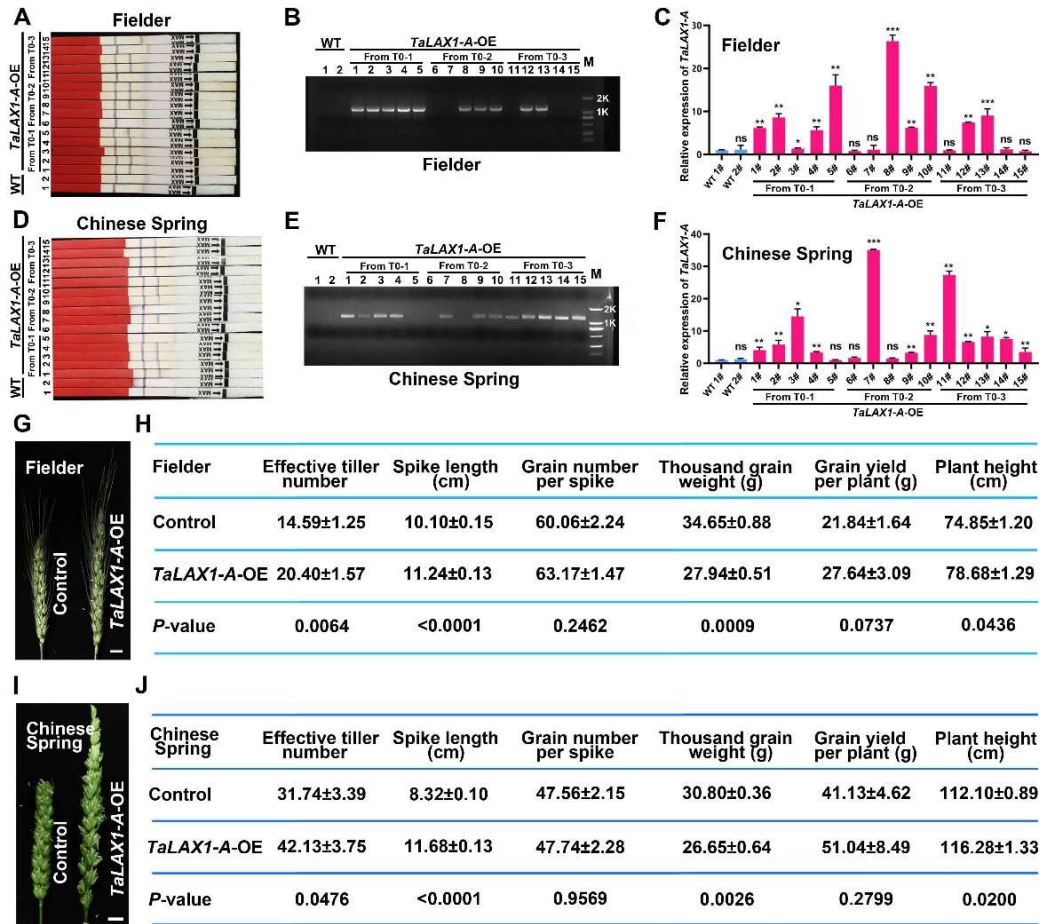

28  
29 **Supplemental Figure 3. T1 progeny of *TaLAX1-A-OE* transgenic lines in Fielder**  
30 **and Chinese Spring. (Supports Figure 3)**

31 (A-C) Identification of putative T1 progeny of *TaLAX1-A-OE* transgenic lines from 3  
32 T0 lines in Fielder by QuickStix strips for the Bar protein (A), amplification of  
33 transgenic-specific PCR product (B) and RT-qPCR analysis (C). 2K: 2000 bp, 1K: 1000  
34 bp, M: DNA marker.

35 (D-F) Identification of putative T1 progeny of *TaLAX1-A-OE* transgenic lines from 3  
36 T0 lines in Chinese Spring by QuickStix strips for the Bar protein (D), amplification of  
37 transgenic-specific PCR product (E) and RT-qPCR analysis (F). 2K: 2000 bp, 1K: 1000  
38 bp, M: DNA marker.

39 (G) Spike phenotypes the T1 progeny of non-transgenic lines (control) or *TaLAX1-A-*  
40 *O-E* transgenic lines in Fielder. Scale bar = 1 cm.

41 (H) Main agronomic characters of the T1 progeny of control or *TaLAX1-A-OE*  
42 transgenic lines in Fielder.

43 (I) Spike phenotypes of the T1 progeny of control or *TaLAX1-A-OE* transgenic lines  
44 in Chinese Spring. Scale bar = 1 cm.

45 (J) Main agronomic characters of the T1 progeny of control or *TaLAX1-A-OE*  
46 transgenic lines in Chinese Spring.

47 Values in (C, F) are means ± SD, values in (H, J) are means ± SEM. All experiments

48 in (C, F) were performed at least three times. The data in (H, J) presents a count of the  
49 main agronomic characteristics for 15 positive transgenic lines of the T1 generation in  
50 Fielder and 16 positive transgenic lines of the T1 generation in Chinese Spring,  
51 respectively. \*\*\*  $P < 0.001$ ; \*\*  $P < 0.01$ ; \*  $P < 0.05$ ; ns, not significant (Student's  $t$ -test,  
52 two-tailed).

53 Supplemental Figure 4

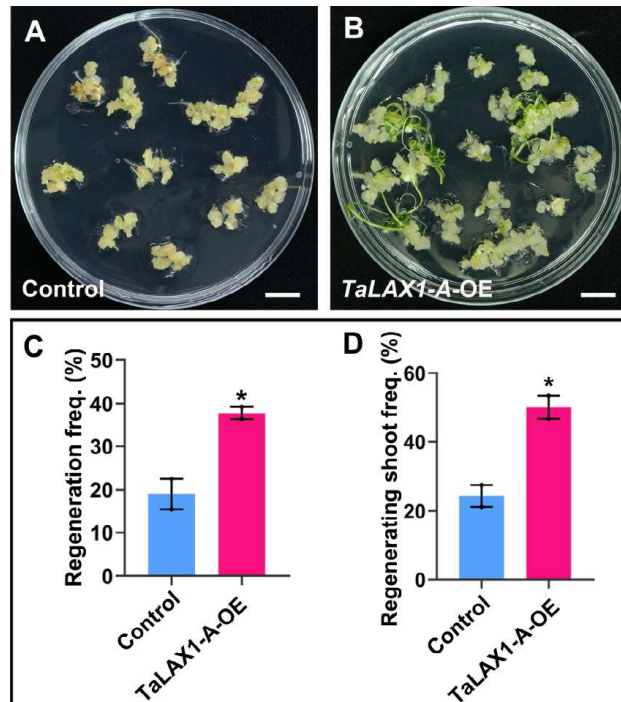

54

55 **Supplemental Figure 4. Overexpression of *TaLAX1-A* promotes shoot regeneration**  
56 **after particle bombardment. (Supports Figures 1, 2 and 3)**

57 **(A)** Shoot regeneration phenotypes of Fielder immature embryos infected with empty  
58 vector (control) by particle bombardment. Scale bar = 1 cm.

59 **(B)** Shoot regeneration phenotypes of Fielder immature embryos infected with  
60 *TaLAX1-A-OE* by particle bombardment. Scale bar = 1 cm.

61 **(C)** Regeneration frequencies of Fielder immature embryos infected with control or  
62 *TaLAX1-A-OE* vector by particle bombardment.

63 **(D)** Regenerating shoot frequencies of Fielder immature embryos infected with control  
64 or *TaLAX1-A-OE* vector by particle bombardment.

65 Values in **(C, D)** are means  $\pm$  SEM from two independent experiments. Black points  
66 are the results from individual experiments. \*  $P < 0.05$  (Student's *t*-test, two-tailed).

67

68 Supplemental Figure 5

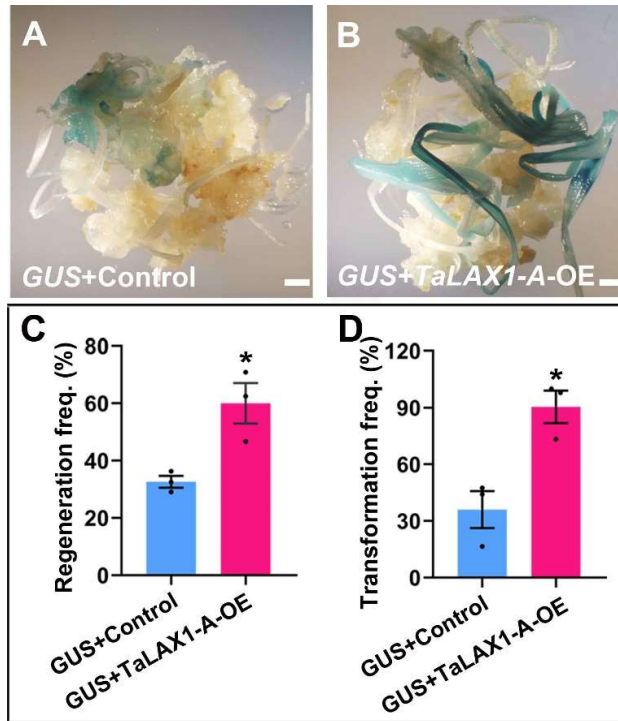

69

70 Supplemental Figure 5. Overexpression of *TaLAX1-A* promotes *GUS*  
71 transformation by two *Agrobacterium*-mediated co-transformation methods.  
72 (Supports Figure 4)

73 (A) and (B) show the shoot regeneration and transformation phenotypes of Fielder  
74 immature embryos infected with a mixture of *Agrobacterium* strains. *Agrobacterium*  
75 suspensions containing *GUS* and empty vector (control) were mixed together in a 1:1  
76 ratio (A), *GUS* and *TaLAX1-A-OE* were mixed together in a 1:1 ratio (B). Scale bar =  
77 2mm.

78 (C) Regeneration frequencies of Fielder immature embryos infected with mixtures of  
79 different *Agrobacterium* strains.

80 (D) Transformation frequencies of Fielder immature embryos infected with mixtures of  
81 different *Agrobacterium* strains.

82 Values in (C, D) are means  $\pm$  SEM from three independent experiments. Black points  
83 are the results from individual experiments. \*  $P < 0.05$  (Student's *t*-test, two-tailed).

84

85 **Supplemental Figure 6**

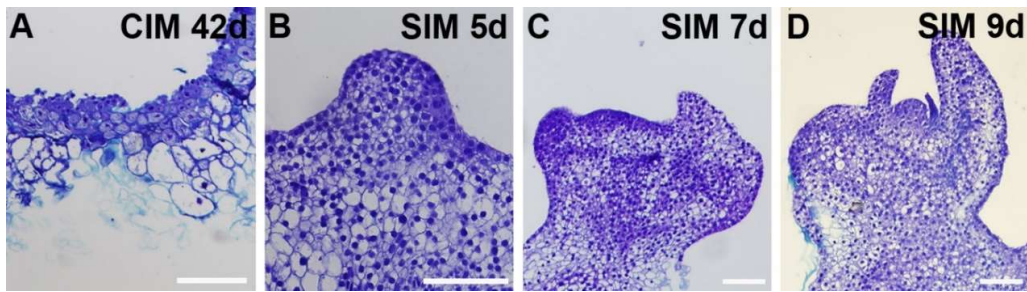

86

87 **Supplemental Figure 6. Paraffin sections of the shoot regeneration process of**  
88 **Chinese Spring. (Supports Figure 5)**

89 **(A)** The immature embryos of Chinese Spring were cultured on CIM for 42 days. Scale  
90 bar = 200  $\mu$ m.

91 **(B-D)** The immature embryos of Chinese Spring were cultured on CIM for 42 days,  
92 followed by incubation on SIM for 5 days **(B)**, 7 days **(C)** or 9 days **(D)**. Scale bar =  
93 200  $\mu$ m.  
94



95 **Supplemental Figure 7**

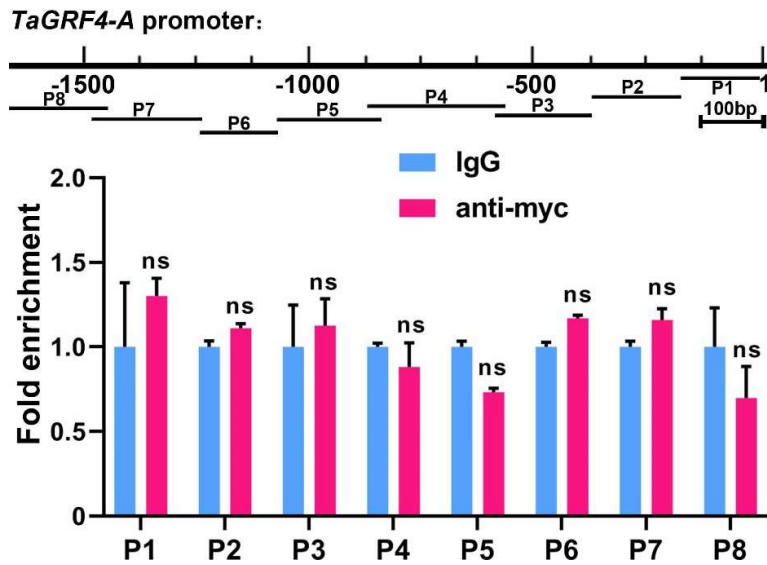

96

97 **Supplemental Figure 7. *TaLAX1-A* does not bind to the *TaGRF4-A* promoter.**  
98 **(Supports Figure 5)**

99 ChIP-qPCR of the *TaGRF4-A* promoter using an anti-*myc* antibody in the *TaLAX1-A*-  
100 OE transgenic plants, negative controls used IgG antibody on *TaLAX1-A*-OE samples.  
101 There was no enrichment of fragments. Values are means  $\pm$  SD from three independent  
102 experiments. ns, not significant (Student's *t*-test, two-tailed).

103

104 Supplemental Figure 8

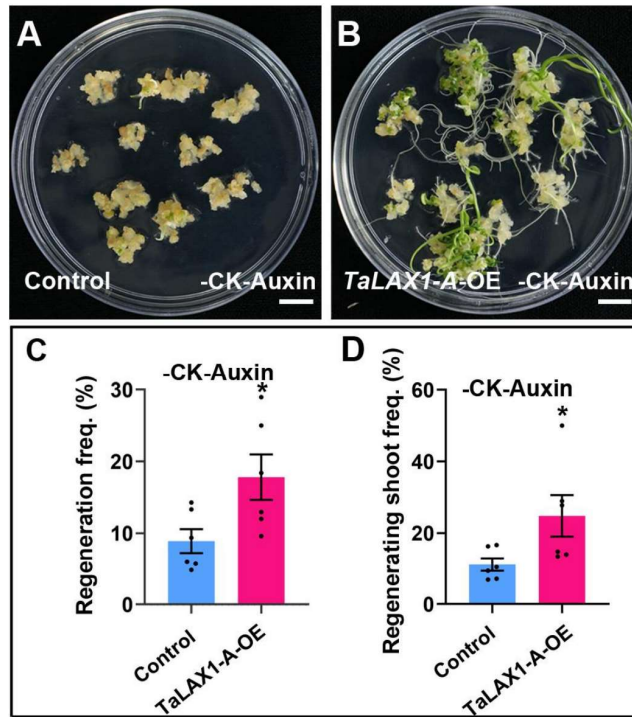

105

106 Supplemental Figure 8. Effect of *TaLAX1-A* overexpression on shoot regeneration  
107 in the absence of exogenous cytokinin and auxin. (Supports Figure 6)

108 (A) Shoot regeneration phenotypes of Fielder immature embryos cultured on CIM  
109 (without exogenous auxin) for 42 days and on SIM (without exogenous cytokinin) for  
110 20 days after infection with empty vector (control). Scale bar = 1 cm.

111 (B) Shoot regeneration phenotypes of Fielder immature embryos cultured on CIM  
112 (without exogenous auxin) for 42 days and on SIM (without exogenous cytokinin) for  
113 20 days after infection to introduce the *TaLAX1-A*-OE vector. Scale bar = 1 cm.

114 (C) Regeneration frequencies of Fielder immature embryos cultured on CIM (without  
115 exogenous auxin) for 42 days and on SIM (without exogenous cytokinin) for 20 days  
116 after infection to introduce the control or *TaLAX1-A*-OE vector.

117 (D) Regenerating shoot frequencies of Fielder immature embryos cultured on CIM  
118 (without exogenous auxin) for 42 days and on SIM (without exogenous cytokinin) for  
119 20 days after infection to introduce the control or *TaLAX1-A*-OE vector.

120 Values in (C, D) are means  $\pm$  SEM from six independent experiments. Black points  
121 indicate results from individual experiments. \*  $P < 0.05$  (Student's *t*-test, two-tailed).

122

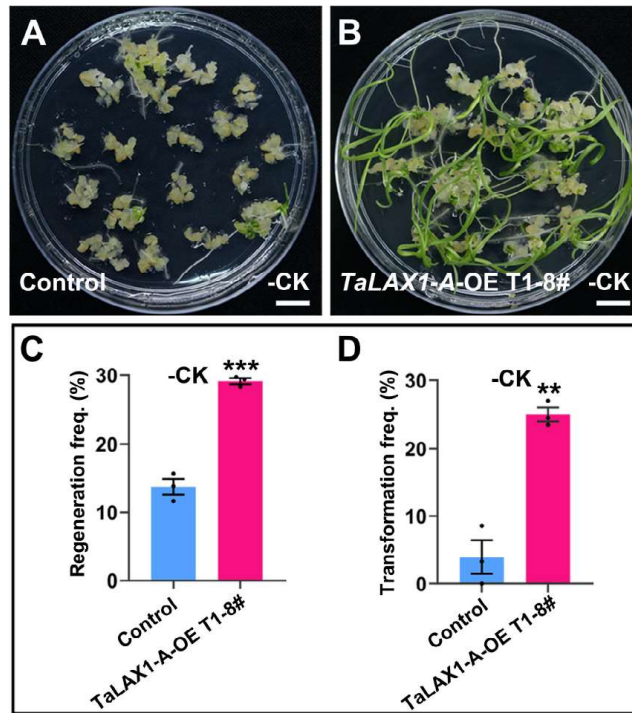

124

125 **Supplemental Figure 9. Regeneration and transformation of T1 progeny of**  
 126 ***TaLAX1-A-OE* transgenic lines in the absence of exogenous cytokinin. (Supports**  
 127 **Figure 6)**

128 (A) Fielder immature embryos from T1 progeny of non-transgenic lines (control) were  
 129 cultured on CIM for 42 days and on SIM (without exogenous cytokinin) for 20 days  
 130 after infection with the *Ubi<sub>pro</sub>:GUS* vector. Scale bar = 1 cm.

131 (B) Fielder immature embryos from T1 progeny of *TaLAX1-A-OE* lines were cultured  
 132 on CIM for 42 days and on SIM (without exogenous cytokinin) for 20 days after  
 133 infection with the *Ubi<sub>pro</sub>:GUS* vector. Scale bar = 1 cm.

134 (C) Regeneration frequencies of immature embryos of control or *TaLAX1-A-OE*  
 135 transgenic lines infected with the *Ubi<sub>pro</sub>:GUS* vector in the absence of cytokinin.

136 (D) Transformation frequencies of immature embryos of control or *TaLAX1-A-OE*  
 137 transgenic lines infected with the *Ubi<sub>pro</sub>:GUS* vector in the absence of cytokinin.

138 Values in (C, D) are means ± SEM from three independent experiments. Black points  
 139 are the results from individual experiments. \*\*\* *P* < 0.001; \*\* *P* < 0.01 (Student's *t*-  
 140 test, two-tailed).

141

142 Supplemental Figure 10

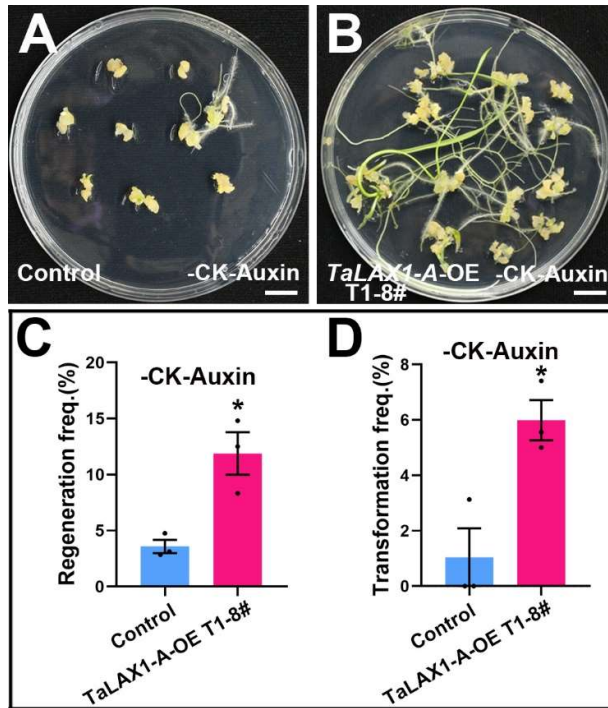

143

144 Supplemental Figure 10. Regeneration and transformation of T1 progeny of  
 145 *TaLAX1-A-OE* transgenic lines in the absence of exogenous cytokinin and auxin.  
 146 (Supports Figure 6)

147 (A) Fielder immature embryos from T1 progeny of non-transgenic lines (control) were  
 148 cultured on CIM (without exogenous auxin) for 42 days and on SIM (without  
 149 exogenous cytokinin) for 20 days after infection with the *Ubi<sub>pro</sub>:GUS* vector. Scale bar  
 150 = 1 cm.

151 (B) Fielder immature embryos from T1 progeny of *TaLAX1-A-OE* lines were cultured  
 152 on CIM (without exogenous auxin) for 42 days and on SIM (without exogenous  
 153 cytokinin) for 20 days after infection with the *Ubi<sub>pro</sub>:GUS* vector. Scale bar = 1 cm.

154 (C) Regeneration frequencies of immature embryos of control or *TaLAX1-A-OE*  
 155 transgenic lines infected with the *Ubi<sub>pro</sub>:GUS* vector in the absence of cytokinin and  
 156 auxin.

157 (D) Transformation frequencies of immature embryos of control or *TaLAX1-A-OE*  
 158 transgenic lines infected with the *Ubi<sub>pro</sub>:GUS* vector in the absence of cytokinin and  
 159 auxin .

160 Values in (C, D) are means  $\pm$  SEM from three independent experiments. Black points  
 161 are the results from individual experiments. \*  $P < 0.05$  (Student's *t*-test, two-tailed).

162

163 **Supplemental Figure 11**

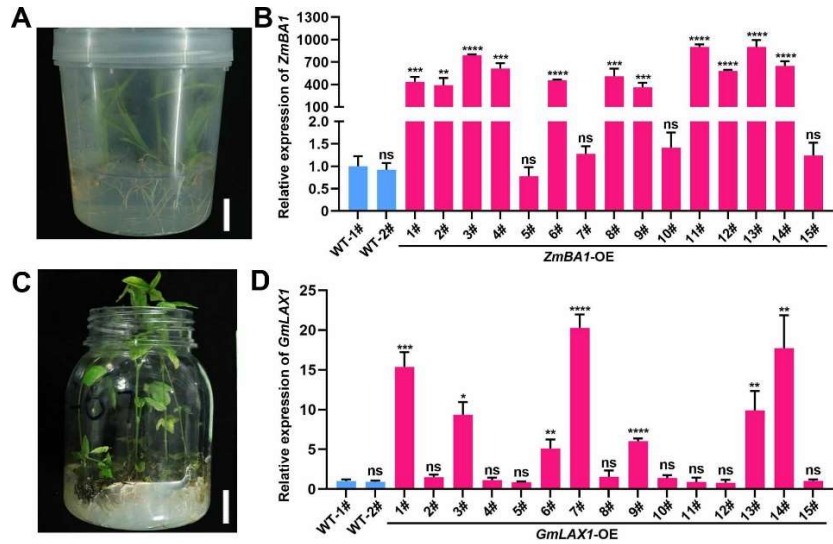

164

165 **Supplemental Figure 11. Identification of putative T0 progeny of *ZmBAI*-OE or**  
 166 ***GmLAXI*-OE transgenic lines. (Supports Figure 7)**

167 (A) Plants obtained from regenerated shoots induced by *ZmBAI*-OE on a rooting  
 168 medium for root elongation. Scale bar = 1 cm.

169 (B) Identification of putative T0 progeny of *ZmBAI*-OE transgenic lines by RT-qPCR  
 170 analysis.

171 (C) Plants obtained from regenerated shoots induced by *GmLAXI*-OE on a rooting  
 172 medium for root elongation. Scale bar = 2 cm.

173 (D) Identification of putative T0 progeny of *GmLAXI*-OE transgenic lines by RT-qPCR  
 174 analysis.

175 Values in (B, D) are means ± SD, all experiments were performed at least three times.

176 \*\*\*\*  $P < 0.0001$ ; \*\*\*  $P < 0.001$ ; \*\*  $P < 0.01$ ; \*  $P < 0.05$ ; ns, not significant (Student's

177 *t*-test, two-tailed).

178
